# Supplementary material for: DNA Topoisomerases Participate in Fragility of the Oncogene RET
Source: PubMed Central journal article supplement (PMC3770543; doi:10.1371/journal.pone.0075741), 2013-09-11
Supplement: pone.0075741.s001.pdf [file pone.0075741.s001.pdf]

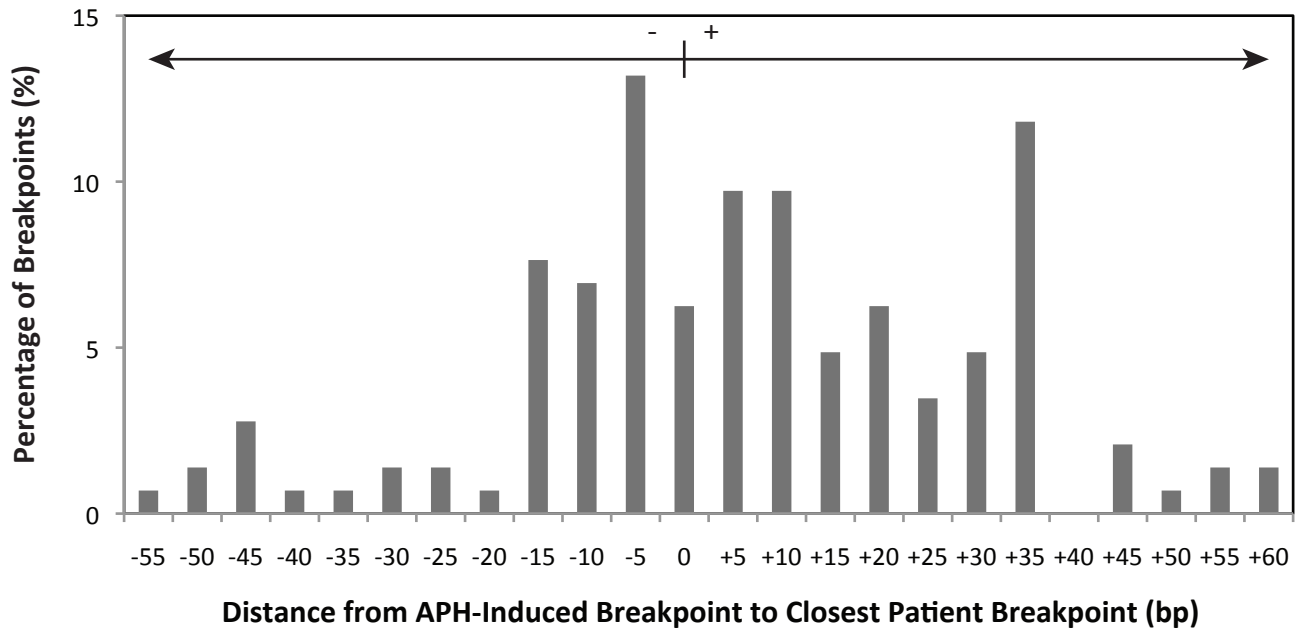

**Figure S1.** Location of APH-induced breakpoints within intron 11 of *RET* relative to known patient breakpoints. The nucleotide location of previously reported fusion points observed in PTC patients with *RET/PTC1* or *RET/PTC3* translocations [39, 47-50] were compared to 144 APH-induced breakpoints. The distance range is represented on the x axis, where a negative position refers to the closest patient breakpoint being upstream of the APH-induced breakpoint and a positive being downstream, and the percentage of the total APH-induced breakpoints contained within the distance range is displayed on the y axis.
