# Supplementary material for: DNA Topoisomerases Participate in Fragility of the Oncogene RET
Source: PubMed Central journal article supplement (PMC3770543; doi:10.1371/journal.pone.0075741), 2013-09-11
Supplement: pone.0075741.s003.pdf [file pone.0075741.s003.pdf]

Table S1. Primer and Linker Sequences for LM-PCR.

| Region  | Primer Set | Primer Name | Primer Sequence <sup>a</sup>              |
|---------|------------|-------------|-------------------------------------------|
| RET     | 1          | RET-7       | 5'-BBCAGCATCTTCACGGCCACCGTGG-3'           |
|         |            | RET-R1b     | 5'-TATCCTGCTCTGCCTTTCAGATGG-3'            |
|         |            | RET-R1      | 5'-AGTTCTTCCGAGATTCC-3'                   |
|         | 2          | RET-8       | 5'-BBCACATGAGGGCGACATCAACCTG-3'           |
|         |            | RET-9       | 5'-ACCTGTTTACCACACTCTAGAGAC-3'            |
|         |            | RET-10      | 5'-CCTCTCAAATACTGAGGTTGAGTC-3'            |
|         | 3          | RET-14      | 5'-BBTACCACAAGTTTGCCACAAGCCACCC-3'        |
|         |            | RET-15      | 5'-CCCGGTCAGCTACTCCTCTTCC-3'              |
|         |            | RET-16      | 5'-TCTCCGTGGATGCCTTCAAGAT-3'              |
|         | 4          | RET-17      | 5'-BBGCTCTAGGATGAGCCACCAGAGTCC-3'         |
|         |            | RET-18      | 5'-CCAGGAAGGCCGCACTGGTC-3'                |
|         |            | RET-19      | 5'-GCTGCTGCTGGCAGAGACCA-3'                |
| FRA3B   | 1          | FRA3B-20    | 5'-BBCCTATCTGACGACTTCAC-3'                |
|         |            | FRA3B-9     | 5'-GAAAGCATAAAGTGTGGC-3'                  |
|         |            | FRA3B-23    | 5'-TAACTGCTTATTTTTCCGATGT-3'              |
| 12p12.3 | 1          | 12p12.3-1   | 5'-BBTTTTCTTGACTAGTCTAACCAGAT-3'          |
|         |            | 12p12.3-2   | 5'-TTTCACTTGATTGATCTCCTTCAT-3'            |
|         |            | 12p12.3-3   | 5'-TTTCCACTGTTTGCCGCATTAT-3'              |
| Linker  |            | LL3         | 5'-CGAGTTCAGTCCGTAGACCATGGAGATCTGAATTC-3' |
|         |            | LP2         | 5'-GAATTCAGATCTCC-3'                      |
|         |            | LL4         | 5'-CGAGTTCAGTCCGTAGAC-3'                  |
|         |            | LL2         | 5'-GTAGACCATGGAGATCTGAAATTC-3'            |

<sup>a</sup>B, biotin
