# Supplementary material for: DNA Topoisomerases Participate in Fragility of the Oncogene RET
Source: PubMed Central journal article supplement (PMC3770543; doi:10.1371/journal.pone.0075741), 2013-09-11
Supplement: pone.0075741.s004.pdf [file pone.0075741.s004.pdf]

Table S2. APH-Induced DNA Breakpoints within *RET* Intron 11.

| Breakpoint Number | Strand <sup>a</sup> | Distance From Exon 11 (bp) | Distance to Closest Patient Breakpoint (bp) <sup>b</sup> | Distance to Closest Predicted Topo I Cleavage Site (bp) <sup>b</sup> | Distance to Closest Predicted Topo II Cleavage Site (bp) <sup>b</sup> |
|-------------------|---------------------|----------------------------|----------------------------------------------------------|----------------------------------------------------------------------|-----------------------------------------------------------------------|
| 1                 | Top                 | 48                         | -15                                                      | -19                                                                  | +12                                                                   |
| 2                 | Bottom              | 86                         | +35                                                      | +4                                                                   | -8                                                                    |
| 3                 | Bottom              | 100                        | +21                                                      | -10                                                                  | +2                                                                    |
| 4                 | Bottom              | 102                        | +19                                                      | -12                                                                  | 0                                                                     |
| 5                 | Bottom              | 116                        | +5                                                       | +8                                                                   | -3                                                                    |
| 6                 | Bottom              | 150                        | +18                                                      | +3                                                                   | +9                                                                    |
| 7                 | Bottom              | 152                        | +16                                                      | +1                                                                   | +7                                                                    |
| 8                 | Bottom              | 154                        | +14                                                      | -1                                                                   | +5                                                                    |
| 9                 | Top                 | 173                        | -1                                                       | -6                                                                   | -1                                                                    |
| 10                | Bottom              | 211                        | +33                                                      | -3                                                                   | +7                                                                    |
| 11                | Bottom              | 212                        | +32                                                      | -4                                                                   | +6                                                                    |
| 12                | Bottom              | 215                        | +29                                                      | +4                                                                   | +3                                                                    |
| 13                | Bottom              | 215                        | +29                                                      | +4                                                                   | +3                                                                    |
| 14                | Top                 | 233                        | +11                                                      | +2                                                                   | -5                                                                    |
| 15                | Bottom              | 238                        | +6                                                       | +6                                                                   | +5                                                                    |
| 16                | Bottom              | 249                        | -2                                                       | +3                                                                   | -6                                                                    |
| 17                | Bottom              | 277                        | -24                                                      | -3                                                                   | -9                                                                    |
| 18                | Bottom              | 280                        | -27                                                      | +5                                                                   | +9                                                                    |
| 19                | Bottom              | 283                        | -30                                                      | +2                                                                   | +6                                                                    |
| 20                | Bottom              | 294                        | -41                                                      | +4                                                                   | +3                                                                    |
| 21                | Bottom              | 297                        | -44                                                      | +1                                                                   | 0                                                                     |
| 22                | Bottom              | 297                        | -44                                                      | +1                                                                   | 0                                                                     |
| 23                | Bottom              | 326                        | +29                                                      | -5                                                                   | 0                                                                     |
| 24                | Bottom              | 329                        | +26                                                      | +2                                                                   | -3                                                                    |
| 25                | Bottom              | 348                        | +7                                                       | +1                                                                   | -2                                                                    |
| 26                | Bottom              | 356                        | +1                                                       | +3                                                                   | +5                                                                    |
| 27                | Top                 | 378                        | -7                                                       | -6                                                                   | +3                                                                    |
| 28                | Top                 | 440                        | 0                                                        | 0                                                                    | +1                                                                    |
| 29                | Bottom              | 466                        | -1                                                       | -3                                                                   | -8                                                                    |
| 30                | Top                 | 500                        | +6                                                       | +7                                                                   | -1                                                                    |
| 31                | Bottom              | 502                        | +4                                                       | -1                                                                   | +1                                                                    |
| 32                | Bottom              | 507                        | -1                                                       | +1                                                                   | 0                                                                     |
| 33                | Bottom              | 556                        | +31                                                      | -5                                                                   | -3                                                                    |
| 34                | Top                 | 584                        | +3                                                       | -7                                                                   | +2                                                                    |
| 35                | Bottom              | 592                        | -1                                                       | +8                                                                   | -2                                                                    |
| 36                | Top                 | 605                        | -7                                                       | -2                                                                   | -3                                                                    |
| 37                | Top                 | 651                        | -53                                                      | +1                                                                   | -8                                                                    |
| 38                | Bottom              | 680                        | +57                                                      | +6                                                                   | -1                                                                    |
| 39                | Bottom              | 687                        | +50                                                      | -1                                                                   | +6                                                                    |
| 40                | Bottom              | 694                        | +43                                                      | 0                                                                    | 0                                                                     |

|    |        |      |     |     |    |
|----|--------|------|-----|-----|----|
| 41 | Top    | 706  | +31 | +1  | -1 |
| 42 | Top    | 724  | +13 | -17 | +3 |
| 43 | Bottom | 735  | +2  | -8  | -4 |
| 44 | Bottom | 755  | -1  | -7  | 0  |
| 45 | Top    | 794  | -40 | -1  | 0  |
| 46 | Top    | 806  | +34 | +11 | +2 |
| 47 | Top    | 806  | +34 | +11 | +2 |
| 48 | Top    | 806  | +34 | +11 | +2 |
| 49 | Top    | 806  | +34 | +11 | +2 |
| 50 | Top    | 806  | +34 | +11 | +2 |
| 51 | Top    | 806  | +34 | +11 | +2 |
| 52 | Top    | 806  | +34 | +11 | +2 |
| 53 | Top    | 806  | +34 | +11 | +2 |
| 54 | Top    | 809  | +31 | +8  | -1 |
| 55 | Top    | 809  | +31 | +8  | -1 |
| 56 | Top    | 815  | +25 | +2  | 0  |
| 57 | Bottom | 830  | 10  | +9  | 0  |
| 58 | Top    | 845  | 0   | -4  | 0  |
| 59 | Bottom | 845  | 0   | -4  | 0  |
| 60 | Top    | 855  | -10 | 0   | +4 |
| 61 | Top    | 855  | -10 | 0   | +4 |
| 62 | Top    | 898  | -6  | +5  | -1 |
| 63 | Top    | 900  | -8  | +3  | -3 |
| 64 | Top    | 935  | +9  | -6  | +1 |
| 65 | Bottom | 941  | +3  | -3  | -1 |
| 66 | Top    | 945  | 0   | +3  | +3 |
| 67 | Bottom | 970  | -12 | -4  | +3 |
| 68 | Top    | 986  | +28 | 0   | 0  |
| 69 | Top    | 993  | +21 | 0   | -2 |
| 70 | Top    | 996  | +18 | -1  | +2 |
| 71 | Bottom | 999  | +15 | -4  | -8 |
| 72 | Bottom | 1028 | +9  | -5  | -1 |
| 73 | Bottom | 1036 | +2  | 0   | +6 |
| 74 | Bottom | 1045 | +4  | +3  | -3 |
| 75 | Bottom | 1048 | +1  | 0   | +2 |
| 76 | Bottom | 1049 | 0   | -1  | +1 |
| 77 | Bottom | 1094 | +2  | 0   | +3 |
| 78 | Bottom | 1142 | -5  | +1  | +1 |
| 79 | Bottom | 1142 | -5  | +1  | +1 |
| 80 | Bottom | 1182 | -45 | -1  | +4 |
| 81 | Bottom | 1186 | -49 | +1  | 0  |
| 82 | Top    | 1210 | +45 | -4  | -2 |
| 83 | Top    | 1214 | +41 | +7  | +2 |
| 84 | Bottom | 1222 | +33 | -1  | -2 |

|     |        |      |     |     |     |
|-----|--------|------|-----|-----|-----|
| 85  | Bottom | 1223 | +32 | -2  | -3  |
| 86  | Top    | 1239 | +16 | +3  | +3  |
| 87  | Bottom | 1241 | +14 | -1  | -2  |
| 88  | Bottom | 1246 | +9  | -6  | 0   |
| 89  | Bottom | 1246 | +9  | -6  | 0   |
| 90  | Top    | 1254 | +1  | 0   | -2  |
| 91  | Top    | 1260 | 0   | -6  | +6  |
| 92  | Bottom | 1269 | -5  | 0   | +1  |
| 93  | Bottom | 1282 | -3  | -7  | -3  |
| 94  | Bottom | 1292 | -10 | +6  | -1  |
| 95  | Bottom | 1293 | -11 | +5  | -2  |
| 96  | Bottom | 1309 | +24 | +1  | -1  |
| 97  | Bottom | 1320 | +13 | 0   | +6  |
| 98  | Bottom | 1330 | -3  | -5  | -4  |
| 99  | Top    | 1332 | +1  | -9  | +6  |
| 100 | Top    | 1334 | 0   | -11 | +4  |
| 101 | Bottom | 1339 | -5  | -1  | -5  |
| 102 | Top    | 1346 | -12 | 0   | 0   |
| 103 | Top    | 1365 | -31 | -12 | -2  |
| 104 | Bottom | 1383 | -49 | +6  | -10 |
| 105 | Bottom | 1391 | +58 | 0   | +5  |
| 106 | Bottom | 1394 | +55 | -3  | +2  |
| 107 | Bottom | 1396 | +53 | +1  | 0   |
| 108 | Bottom | 1409 | +20 | -8  | +5  |
| 109 | Top    | 1419 | +30 | +18 | -5  |
| 110 | Bottom | 1444 | +5  | +9  | -2  |
| 111 | Top    | 1453 | 0   | +3  | -2  |
| 112 | Bottom | 1456 | -3  | -3  | -1  |
| 113 | Bottom | 1456 | -3  | -3  | -1  |
| 114 | Top    | 1462 | -9  | -4  | 0   |
| 115 | Top    | 1465 | -12 | -7  | -3  |
| 116 | Top    | 1474 | +21 | -1  | -4  |
| 117 | Bottom | 1488 | +7  | -2  | 0   |
| 118 | Top    | 1511 | -15 | +1  | -3  |
| 119 | Top    | 1516 | -20 | -4  | +7  |
| 120 | Top    | 1519 | -23 | +4  | +4  |
| 121 | Bottom | 1534 | +20 | -7  | 0   |
| 122 | Top    | 1545 | +9  | +5  | 0   |
| 123 | Top    | 1556 | -2  | +2  | -3  |
| 124 | Top    | 1576 | -8  | -4  | -1  |
| 125 | Top    | 1579 | -11 | +2  | +2  |
| 126 | Top    | 1581 | -13 | 0   | 0   |
| 127 | Top    | 1581 | -13 | 0   | 0   |
| 128 | Top    | 1583 | -15 | -2  | -2  |

|     |        |      |     |     |    |
|-----|--------|------|-----|-----|----|
| 129 | Top    | 1651 | -6  | -4  | -2 |
| 130 | Top    | 1669 | +12 | +10 | +2 |
| 131 | Bottom | 1678 | +3  | -2  | +3 |
| 132 | Top    | 1707 | +10 | +10 | -3 |
| 133 | Top    | 1708 | +9  | +9  | -4 |
| 134 | Top    | 1718 | -2  | -1  | +3 |
| 135 | Top    | 1718 | -2  | -1  | +3 |
| 136 | Top    | 1720 | -3  | +1  | +1 |
| 137 | Top    | 1738 | -13 | +2  | -2 |
| 138 | Top    | 1763 | +26 | -10 | -3 |
| 139 | Bottom | 1771 | +18 | +1  | -7 |
| 140 | Bottom | 1772 | +17 | 0   | +6 |
| 141 | Top    | 1781 | +8  | +4  | -3 |
| 142 | Top    | 1785 | -4  | 0   | +1 |
| 143 | Top    | 1795 | 0   | +1  | +4 |
| 144 | Top    | 1805 | +10 | -1  | -5 |

<sup>a</sup> The top strand indicates the strand for which the sequence is shown in Figure 2, and the bottom strand indicates the complementary strand.

<sup>b</sup> A positive distance refers to the patient/topoisomerase cleavage site being downstream from the APH-induced breakpoint, while a negative distance is being upstream.
