# Supplementary material for: DNA Topoisomerases Participate in Fragility of the Oncogene RET
Source: PubMed Central journal article supplement (PMC3770543; doi:10.1371/journal.pone.0075741), 2013-09-11
Supplement: pone.0075741.s005.pdf [file pone.0075741.s005.pdf]

Table S3. Location of *RET* Intron 11 APH-Induced DNA Breakpoints on Predicted DNA Secondary Structures.

| Breakpoint Number | Strand <sup>a</sup> | Distance From Exon 11 (bp) | Double-Stranded/Single-Stranded DNA Junction <sup>b</sup> | Double-Stranded DNA Stem | Single-Stranded DNA Loop | Single-Stranded DNA Bubble |
|-------------------|---------------------|----------------------------|-----------------------------------------------------------|--------------------------|--------------------------|----------------------------|
| 1                 | Top                 | 48                         |                                                           | x                        |                          |                            |
| 2                 | Bottom              | 86                         | x                                                         |                          |                          |                            |
| 3                 | Bottom              | 100                        |                                                           | x                        |                          |                            |
| 4                 | Bottom              | 102                        |                                                           | x                        |                          |                            |
| 5                 | Bottom              | 116                        | x                                                         |                          |                          |                            |
| 6                 | Bottom              | 150                        | x                                                         |                          |                          |                            |
| 7                 | Bottom              | 152                        |                                                           | x                        |                          |                            |
| 8                 | Bottom              | 154                        |                                                           | x                        |                          |                            |
| 9                 | Top                 | 173                        | x                                                         |                          |                          |                            |
| 10                | Bottom              | 211                        |                                                           |                          |                          | x                          |
| 11                | Bottom              | 212                        |                                                           |                          |                          | x                          |
| 12                | Bottom              | 215                        |                                                           | x                        |                          |                            |
| 13                | Bottom              | 215                        |                                                           | x                        |                          |                            |
| 14                | Top                 | 233                        | x                                                         |                          |                          |                            |
| 15                | Bottom              | 238                        |                                                           | x                        |                          |                            |
| 16                | Bottom              | 249                        |                                                           | x                        |                          |                            |
| 17                | Bottom              | 277                        | x                                                         |                          |                          |                            |
| 18                | Bottom              | 280                        |                                                           | x                        |                          |                            |
| 19                | Bottom              | 283                        |                                                           | x                        |                          |                            |
| 20                | Bottom              | 294                        |                                                           | x                        |                          |                            |
| 21                | Bottom              | 297                        | x                                                         |                          |                          |                            |
| 22                | Bottom              | 297                        | x                                                         |                          |                          |                            |
| 23                | Bottom              | 326                        | x                                                         |                          |                          |                            |
| 24                | Bottom              | 329                        |                                                           |                          |                          | x                          |
| 25                | Bottom              | 348                        |                                                           |                          | x                        |                            |
| 26                | Bottom              | 356                        | x                                                         |                          |                          |                            |
| 27                | Top                 | 378                        |                                                           | x                        |                          |                            |
| 28                | Top                 | 440                        | x                                                         |                          |                          |                            |
| 29                | Bottom              | 466                        |                                                           |                          |                          | x                          |
| 30                | Top                 | 500                        | x                                                         |                          |                          |                            |
| 31                | Bottom              | 502                        | x                                                         |                          |                          |                            |
| 32                | Bottom              | 507                        | x                                                         |                          |                          |                            |
| 33                | Bottom              | 556                        |                                                           | x                        |                          |                            |
| 34                | Top                 | 584                        |                                                           | x                        |                          |                            |
| 35                | Bottom              | 592                        |                                                           | x                        |                          |                            |
| 36                | Top                 | 605                        |                                                           |                          | x                        |                            |
| 37                | Top                 | 651                        |                                                           | x                        |                          |                            |
| 38                | Bottom              | 680                        |                                                           | x                        |                          |                            |

|    |        |      |   |   |   |   |
|----|--------|------|---|---|---|---|
| 39 | Bottom | 687  |   | x |   |   |
| 40 | Bottom | 694  |   | x |   |   |
| 41 | Top    | 706  |   | x |   |   |
| 42 | Top    | 724  |   | x |   |   |
| 43 | Bottom | 735  | x |   |   |   |
| 44 | Bottom | 755  |   | x |   |   |
| 45 | Top    | 794  | x |   |   |   |
| 46 | Top    | 806  |   | x |   |   |
| 47 | Top    | 806  |   | x |   |   |
| 48 | Top    | 806  |   | x |   |   |
| 49 | Top    | 806  |   | x |   |   |
| 50 | Top    | 806  |   | x |   |   |
| 51 | Top    | 806  |   | x |   |   |
| 52 | Top    | 806  |   | x |   |   |
| 53 | Top    | 806  |   | x |   |   |
| 55 | Top    | 809  |   | x |   |   |
| 54 | Top    | 809  | x |   |   |   |
| 56 | Top    | 815  | x |   |   |   |
| 57 | Bottom | 830  | x |   |   |   |
| 59 | Bottom | 845  |   | x |   |   |
| 58 | Top    | 845  | x |   |   |   |
| 60 | Top    | 855  |   | x |   |   |
| 61 | Top    | 855  |   | x |   |   |
| 62 | Top    | 898  |   | x |   |   |
| 63 | Top    | 900  | x |   |   |   |
| 64 | Top    | 935  |   |   | x |   |
| 65 | Bottom | 941  |   | x |   |   |
| 66 | Top    | 945  |   | x |   |   |
| 67 | Bottom | 970  |   | x |   |   |
| 68 | Top    | 986  | x |   |   |   |
| 69 | Top    | 993  |   | x |   |   |
| 70 | Top    | 996  |   | x |   |   |
| 71 | Bottom | 999  | x |   |   |   |
| 72 | Bottom | 1028 |   |   | x |   |
| 73 | Bottom | 1036 | x |   |   |   |
| 74 | Bottom | 1045 |   |   | x |   |
| 75 | Bottom | 1048 |   |   |   | x |
| 76 | Bottom | 1049 | x |   |   |   |
| 77 | Bottom | 1094 | x |   |   |   |
| 78 | Bottom | 1142 |   | x |   |   |
| 79 | Bottom | 1142 |   | x |   |   |
| 80 | Bottom | 1182 |   |   | x |   |
| 81 | Bottom | 1186 |   |   | x |   |
| 82 | Top    | 1210 |   | x |   |   |

|     |        |      |   |   |   |   |
|-----|--------|------|---|---|---|---|
| 83  | Top    | 1214 |   |   |   | x |
| 84  | Bottom | 1222 | x |   |   |   |
| 85  | Bottom | 1223 |   | x |   |   |
| 86  | Top    | 1239 |   |   |   | x |
| 87  | Bottom | 1241 | x |   |   |   |
| 88  | Bottom | 1246 | x |   |   |   |
| 89  | Bottom | 1246 | x |   |   |   |
| 90  | Top    | 1254 |   |   | x |   |
| 91  | Top    | 1260 |   | x |   |   |
| 92  | Bottom | 1269 |   | x |   |   |
| 93  | Bottom | 1282 | x |   |   |   |
| 94  | Bottom | 1292 |   |   |   | x |
| 95  | Bottom | 1293 |   |   |   | x |
| 96  | Bottom | 1309 |   | x |   |   |
| 97  | Bottom | 1320 |   |   |   | x |
| 98  | Bottom | 1330 |   |   | x |   |
| 99  | Top    | 1332 |   |   | x |   |
| 100 | Top    | 1334 |   |   | x |   |
| 101 | Bottom | 1339 | x |   |   |   |
| 102 | Top    | 1346 |   |   | x |   |
| 103 | Top    | 1365 | x |   |   |   |
| 104 | Bottom | 1383 | x |   |   |   |
| 105 | Bottom | 1391 |   |   |   | x |
| 106 | Bottom | 1394 | x |   |   |   |
| 107 | Bottom | 1396 |   |   | x |   |
| 108 | Bottom | 1409 | x |   |   |   |
| 109 | Top    | 1419 |   | x |   |   |
| 110 | Bottom | 1444 | x |   |   |   |
| 111 | Top    | 1453 | x |   |   |   |
| 112 | Bottom | 1456 |   |   | x |   |
| 113 | Bottom | 1456 |   |   | x |   |
| 114 | Top    | 1462 |   |   | x |   |
| 115 | Top    | 1465 |   | x |   |   |
| 116 | Top    | 1474 |   |   | x |   |
| 117 | Bottom | 1488 |   |   |   | x |
| 118 | Top    | 1511 |   | x |   |   |
| 119 | Top    | 1516 |   | x |   |   |
| 120 | Top    | 1519 |   |   | x |   |
| 121 | Bottom | 1534 |   | x |   |   |
| 122 | Top    | 1545 | x |   |   |   |
| 123 | Top    | 1556 |   |   | x |   |
| 124 | Top    | 1576 | x |   |   |   |
| 125 | Top    | 1579 | x |   |   |   |
| 126 | Top    | 1581 |   | x |   |   |

|     |        |      |   |   |   |  |
|-----|--------|------|---|---|---|--|
| 127 | Top    | 1581 |   | x |   |  |
| 128 | Top    | 1583 |   | x |   |  |
| 129 | Top    | 1651 |   | x |   |  |
| 130 | Top    | 1669 |   | x |   |  |
| 131 | Bottom | 1678 |   | x |   |  |
| 132 | Top    | 1707 |   |   | x |  |
| 133 | Top    | 1708 |   |   | x |  |
| 134 | Top    | 1718 | x |   |   |  |
| 135 | Top    | 1718 | x |   |   |  |
| 136 | Top    | 1720 | x |   |   |  |
| 137 | Top    | 1738 | x |   |   |  |
| 138 | Top    | 1763 | x |   |   |  |
| 139 | Bottom | 1771 |   | x |   |  |
| 140 | Bottom | 1772 |   |   | x |  |
| 141 | Top    | 1781 | x |   |   |  |
| 142 | Top    | 1785 | x |   |   |  |
| 143 | Top    | 1795 | x |   |   |  |
| 144 | Top    | 1805 |   | x |   |  |

<sup>a</sup>The top strand indicates the strand for which the sequence is shown in Figure 2, and the bottom strand indicates the complementary strand.

<sup>b</sup>A breakpoint is located within the double-stranded DNA stem, one nucleotide from the base of the stem with allowance of up to a 5-nt deletion. The allowances for deletion is based upon the observation of up to a 5-nt deletion of *BanI*-induced DNA breakage within *RET* intron 11 as described in the results.
